# Supplementary material for: PIF transcription factors link a neighbor threat cue to accelerated reproduction in Arabidopsis
Source: PubMed Central journal article supplement (PMC6728355; doi:10.1038/s41467-019-11882-7), 2019-09-05
Supplement: 41467_2019_11882_MOESM1_ESM.pdf [file 41467_2019_11882_MOESM1_ESM.pdf]

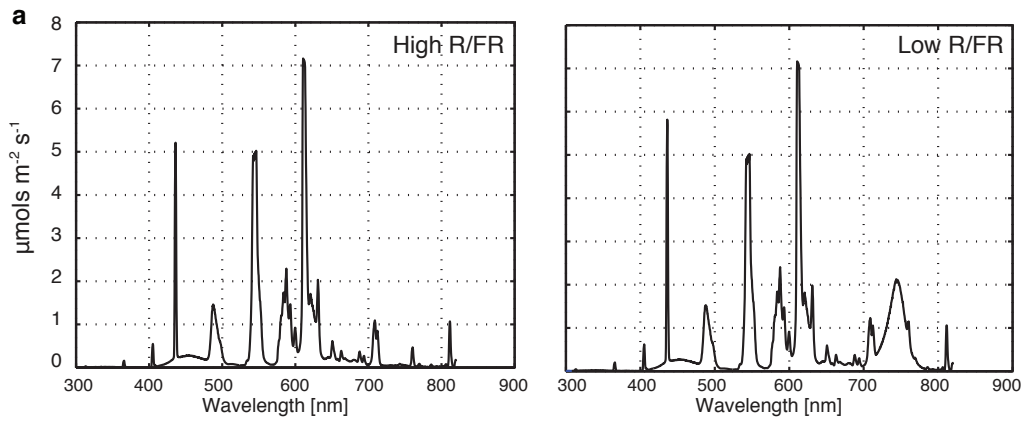

**b**

| Condition | PAR | Blue | Red  | Far-Red | R/FR ratio |
|-----------|-----|------|------|---------|------------|
| High R/FR | 212 | 69.1 | 13.2 | 10.7    | 1.231      |
| Low R/FR  | 215 | 69.0 | 13.3 | 65.9    | 0.201      |

**Supplementary Figure 1**

**a** Light spectra and fluence rate of high R/FR ratio and low R/FR ratio light conditions obtained with OceanOptics USB2000+ spectrometer in CLF plant growth incubator model AR-41L equipped with fluorescent light bulbs and supplemental far-red light-emitting diodes (LED). **b** Light intensities ( $\mu\text{moles m}^{-2} \text{s}^{-1}$ ) of photosynthetically active radiation (PAR, between 400-700 nm), blue (400-500 nm), red (640-700 nm), far-red (700-760 nm) are listed on the table.

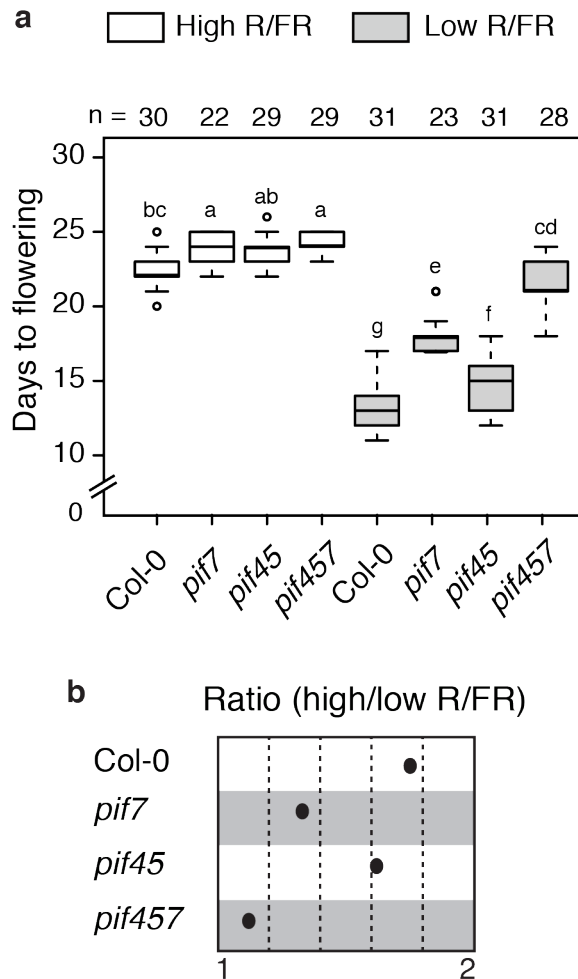

### Supplementary Figure 2

PIFs mediate flowering in low R/FR. Flowering time represented as number of days to flowering after sowing of plants growing under LD at 22°C in high and low R/FR **a** and the ratio of days to flowering in high vs low R/FR **b**. Plants were grown for 5 days high R/FR for complete de-etiolation and either kept in high R/FR or shifted to low R/FR on day 6 until the onset of flowering. Letters represent the significance groups at p-value < 0.01 using ANOVA followed by Tukey honestly significant difference (HSD) test. n represent the number of plants phenotyped. Boxplots were created using the online BoxPlotR <sup>1</sup>; center line, median; box limits, upper and lower quartiles; whiskers, 1.5x interquartile range (IQR); dots, outliers. n represents the number of plants phenotyped.

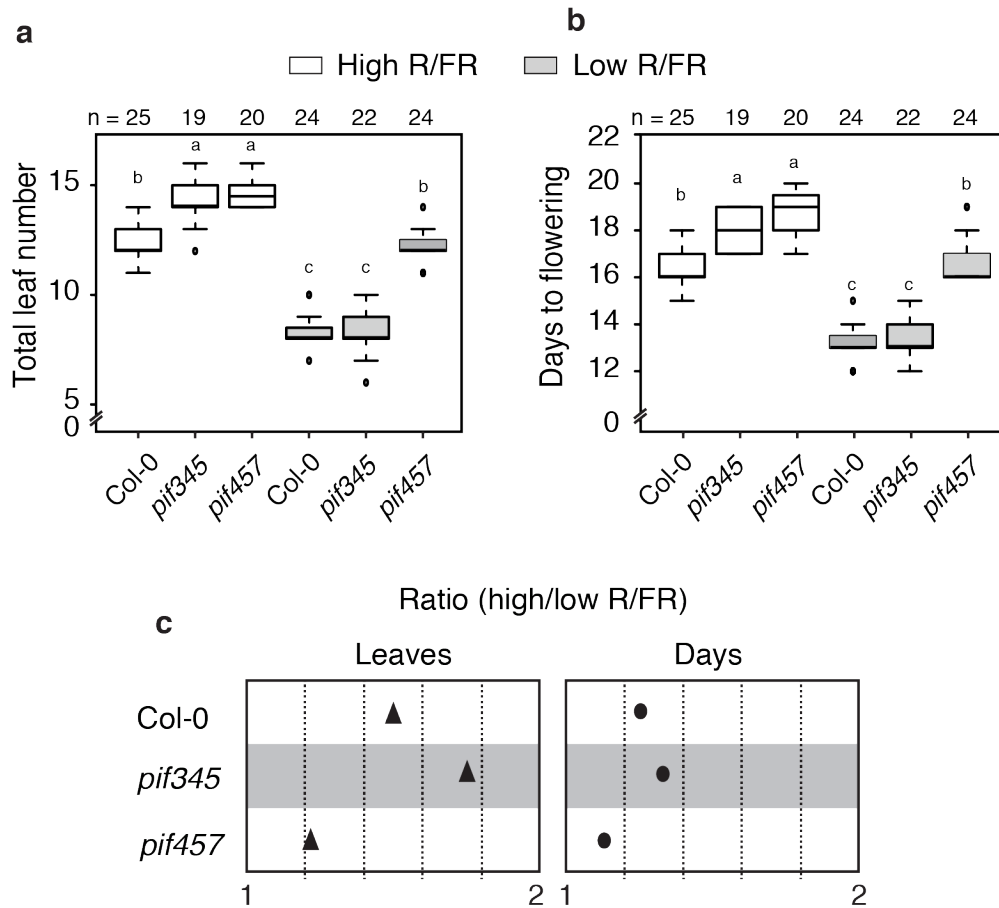

### Supplementary Figure 3

Flowering time phenotype represented as total leaf number **a** and days to flowering **b** after bolting. Plants were grown under LD at 22°C in high R/FR for 5 days and either kept in the same condition or shifted to low R/FR on day 6 until the onset of flowering. **c** Ratio of total leaf number and days to flowering in high vs low R/FR represented in **a** and **b**. Letters represent the significance groups at p-value < 0.01 using ANOVA followed by Tukey honestly significant difference (HSD) test. n represent the number of plants phenotyped. Boxplots were created using the online BoxPlotR<sup>1</sup>; center line, median; box limits, upper and lower quartiles; whiskers, 1.5x interquartile range (IQR); dots, outliers.

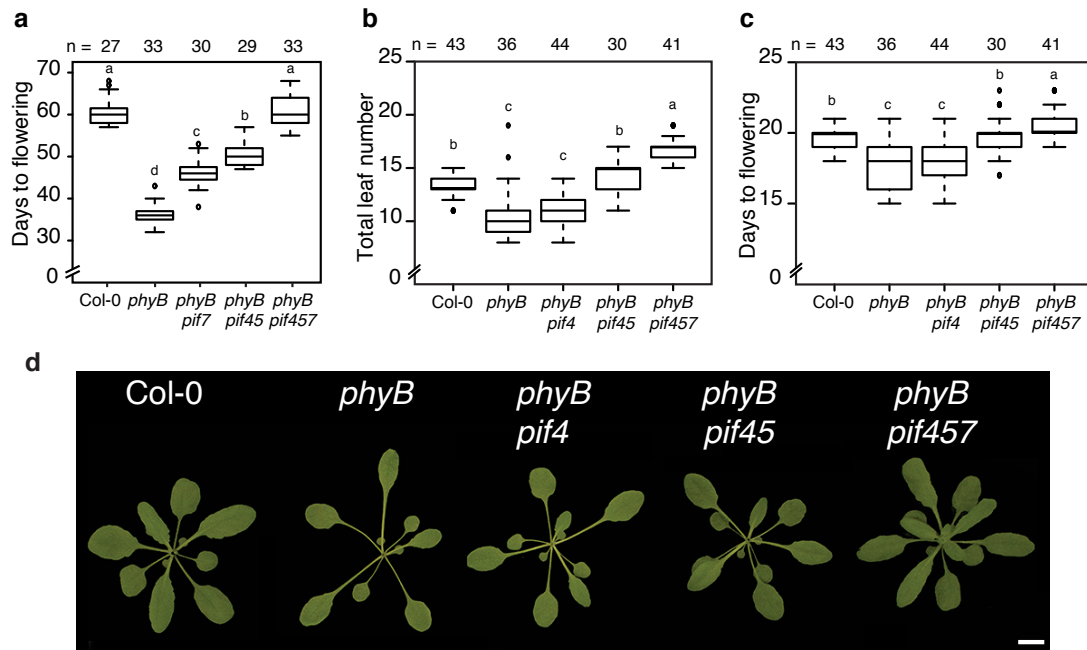

#### Supplementary Figure 4

**a** Days to flowering after sowing of Col-0, *phyB*, *phyB pif7*, *phyB pif4 pif5* and *phyB pif4 pif5 pif7* growing under SD at 22°C in high R/FR. **b** Total leaf number and days to flowering after sowing **c** of Col-0, *phyB*, *phyB pif4*, *phyB pif4 pif5* and *phyB pif4 pif5 pif7* mutants growing under LD at 22°C in high R/FR. **d** 25-day-old representative plants grown under LD. Scale bar correspond to 1 cm. Letters represent the significance groups at p-value < 0.01 using ANOVA followed by Tukey honestly significant difference (HSD) test. n represent the number of plants phenotyped. Boxplots were created using the online BoxPlotR<sup>1</sup>; center line, median; box limits, upper and lower quartiles; whiskers, 1.5x interquartile range (IQR); dots, outliers.

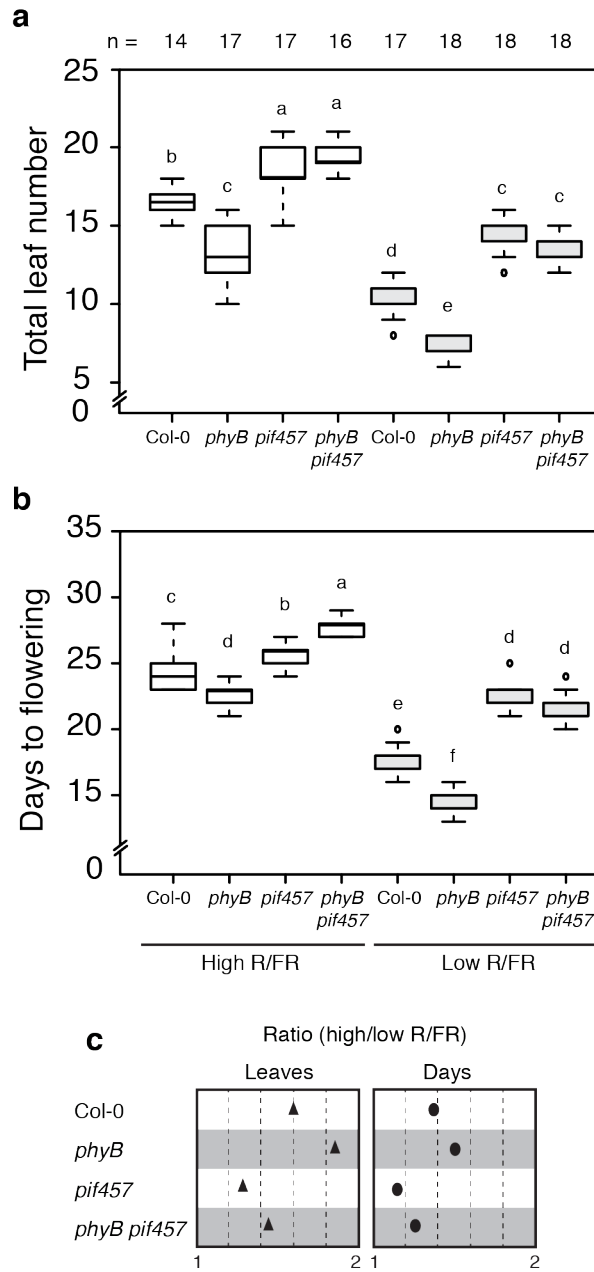

### Supplementary Figure 5

PIF4, PIF5 and PIF7 mediate flowering transition downstream of *phyB* in high and low R/FR. The flowering time phenotype is represented as total leaf number **a** and days to flowering **b** after bolting. Plants were grown under LD at 22°C in high R/FR for 5 days and either kept in the same condition or shifted to low R/FR until the onset of flowering. **c** Ratio of total leaf number and days to flowering in high vs low R/FR represented in **a** and **b**. Letters represent the significance groups at p-value < 0.01 using ANOVA followed by Tukey honestly significant difference (HSD) test. n represent the number of plants phenotyped. Boxplots were created using the online BoxPlotR<sup>1</sup>; center line, median; box limits, upper and lower quartiles; whiskers, 1.5x interquartile range (IQR); dots, outliers.

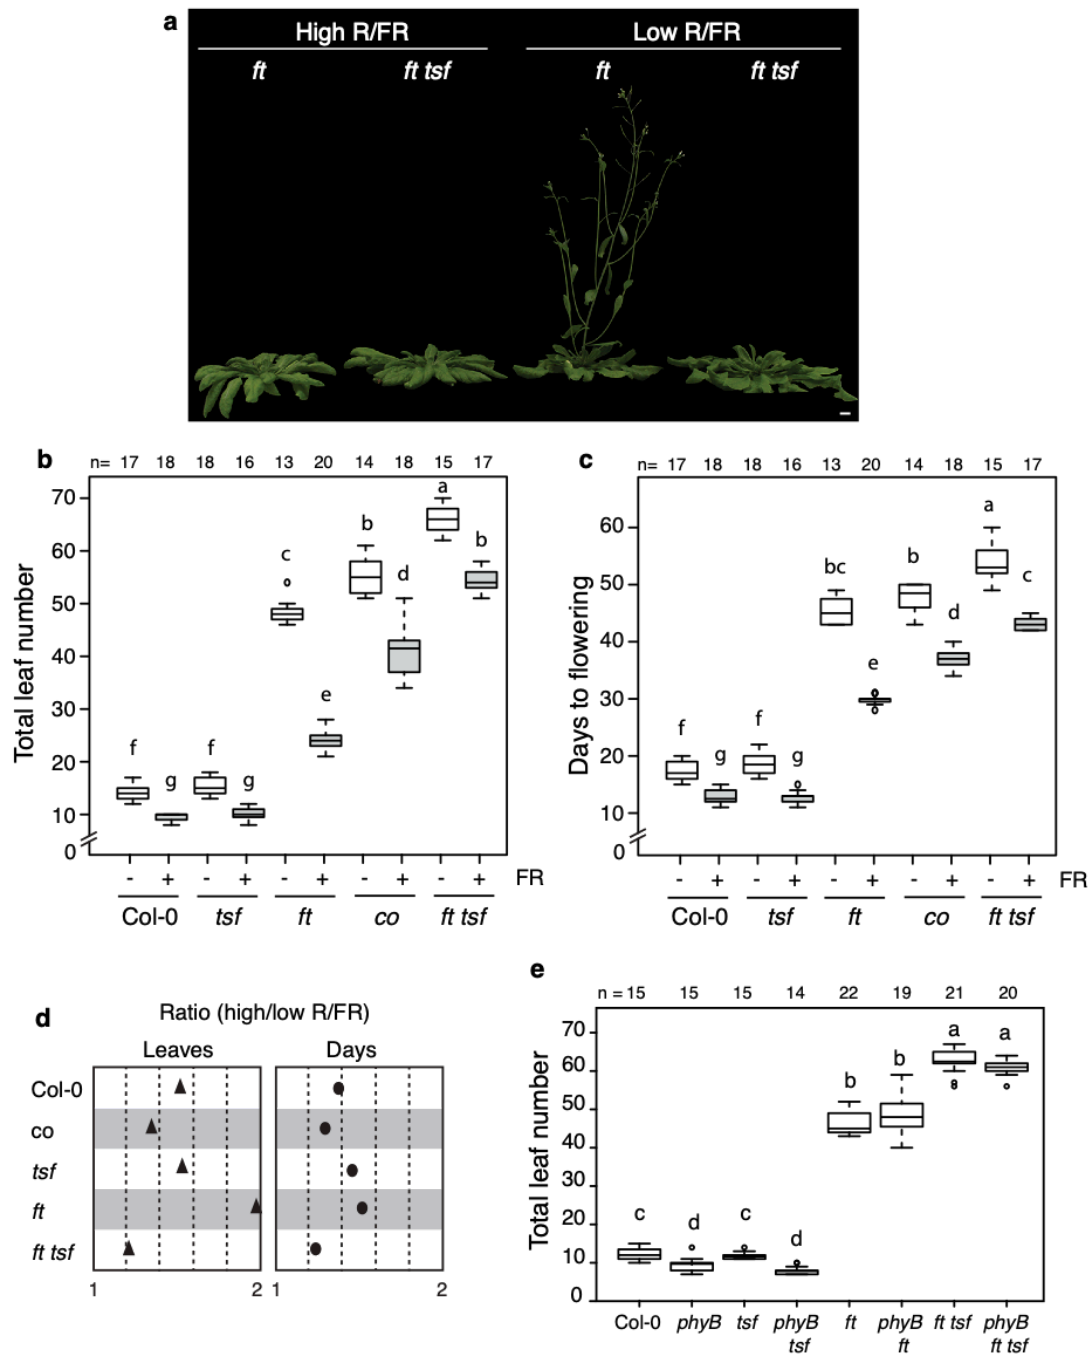

### Supplementary Figure 6

**a** Representative plants of *ft* single and *ft tsf* double mutant genotypes grown under LD at 22°C in high R/FR and low R/FR. Plants were grown under LD at 22°C in high R/FR for 5 days and either kept in the same condition or shifted to low R/FR until the onset of flowering. Flowering time phenotype was represented as total leaf number **b** and days to flowering after sowing **c**. **d** Ratio of total leaf number and days to flowering in high vs low R/FR represented in **b** and **c**. **e** Flowering time phenotype of Col-0, *phyB*, *tsf*, *phyB tsf*, *ft*, *phyB ft*, *ft tsf* and *phyB ft tsf* under LD at 22°C in high R/FR was represented as total leaf number after bolting. FR, supplemental far-red light. Letters represent the significance groups at p-value < 0.01 using ANOVA followed by Tukey honestly significant difference (HSD) test. n represent the number of plants phenotyped. Boxplots were created using the online BoxPlotR<sup>1</sup>; center line, median; box limits, upper and lower quartiles; whiskers, 1.5x interquartile range (IQR); dots, outliers. Scale bar correspond to 1 cm.

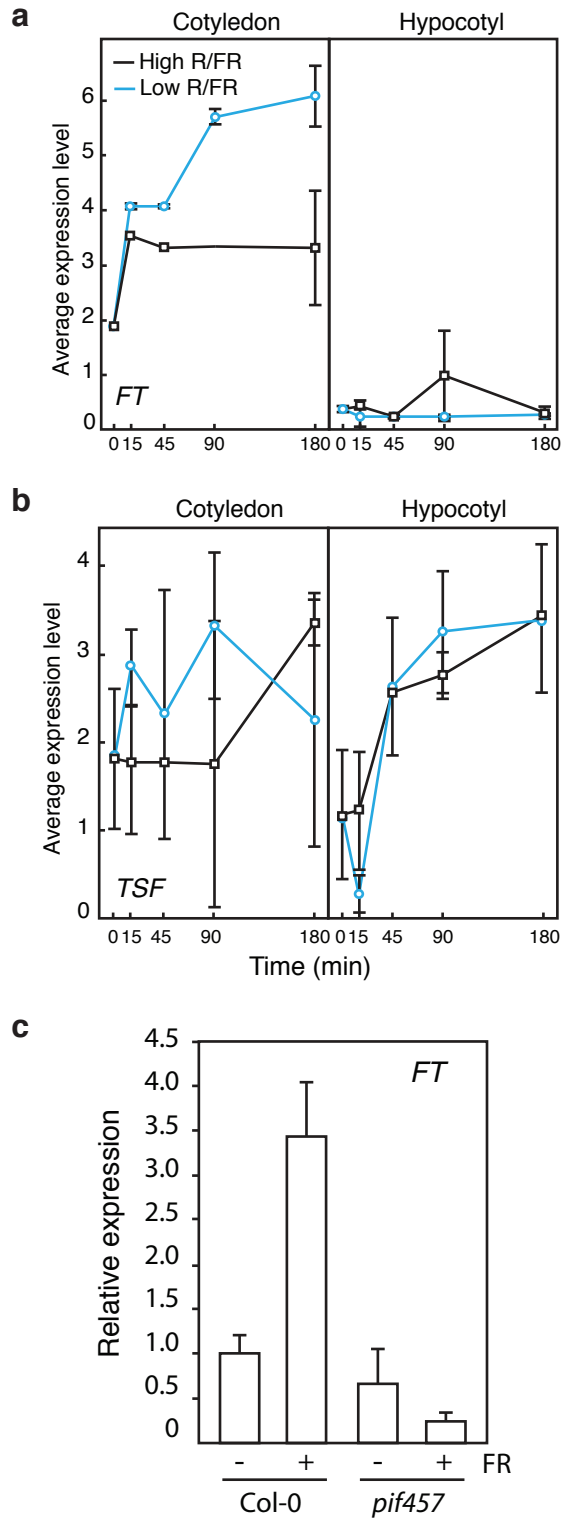

### Supplementary Figure 7

Short-term *FT* up-regulation in low R/FR. *FT* **a** and *TSF* **b** RNA-seq data of relative expression in hypocotyl and cotyledon samples before (0) and 15, 45, 90 and 180 minutes after shift from high to low R/FR. RNA-seq expression data was obtained from <sup>2</sup>. **c** *FT* transcript level using quantitative real-time PCR (RT-qPCR) of Col-0 and *pif4 pif5 pif7* plants growing under LD at 22°C. Plants were grown for 5 days in high R/FR and on day 6 either kept in standard high R/FR or shifted to low R/FR at ZT2. Samples were harvested 180 minutes after shift to low R/FR (ZT 5). FR, supplemental far-red light. Error bars represent the standard deviation of three biological and three technical replicates.

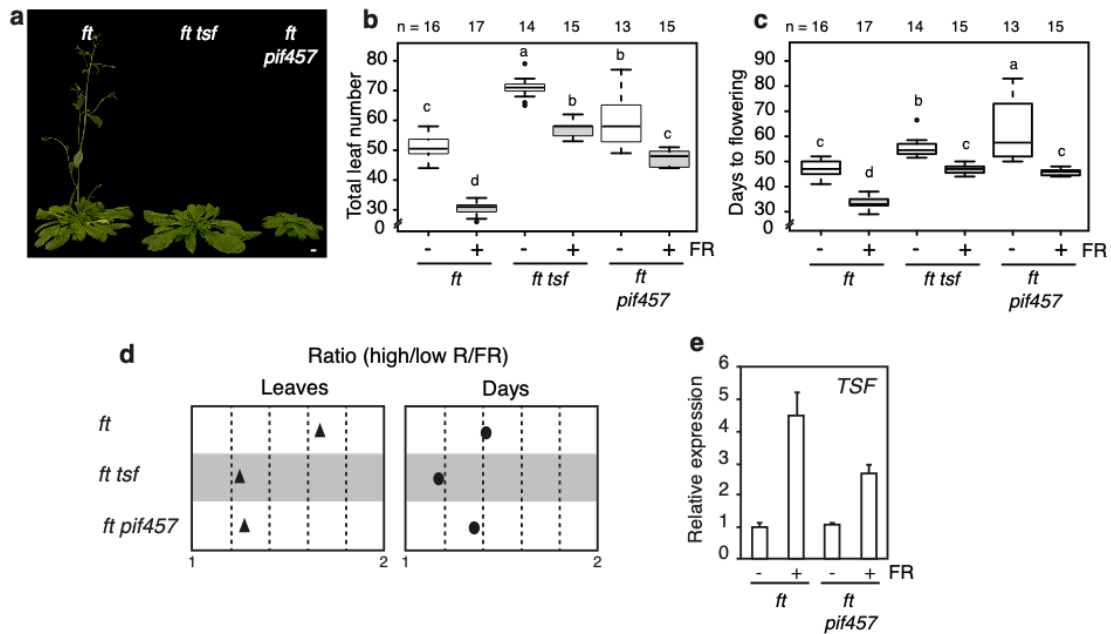

### Supplementary Figure 8

**a** Representative 50-day-old *ft*, *ft tsf* and *ft pif4 pif5 pif7* plants grown under LD at 22°C in low R/FR. Plants were grown under LD at 22°C in high R/FR for 5 days and either kept in the same condition or shifted to low R/FR on day 6 until the onset of flowering. Flowering time was represented as total leaf number **b** and days to flowering after sowing **c** in high and low R/FR. FR, supplemental far-red light. **d** Ratio of total leaf number and days to flowering after sowing in high vs low R/FR. **e** *TSF* mRNA levels in *ft* and *ft pif4 pif5 pif7* 19 days after sowing. Plants were grown under LD at 22°C in high R/FR for 5 days and either kept in the same condition or shifted to low R/FR on day 6. Letters represent the significance groups at p-value < 0.01 using ANOVA followed by Tukey honestly significant difference (HSD) test. n represent the number of plants phenotyped. Boxplots were created using the online BoxPlotR<sup>1</sup>; center line, median; box limits, upper and lower quartiles; whiskers, 1.5x interquartile range (IQR); dots, outliers. Scale bar correspond to 1 cm.



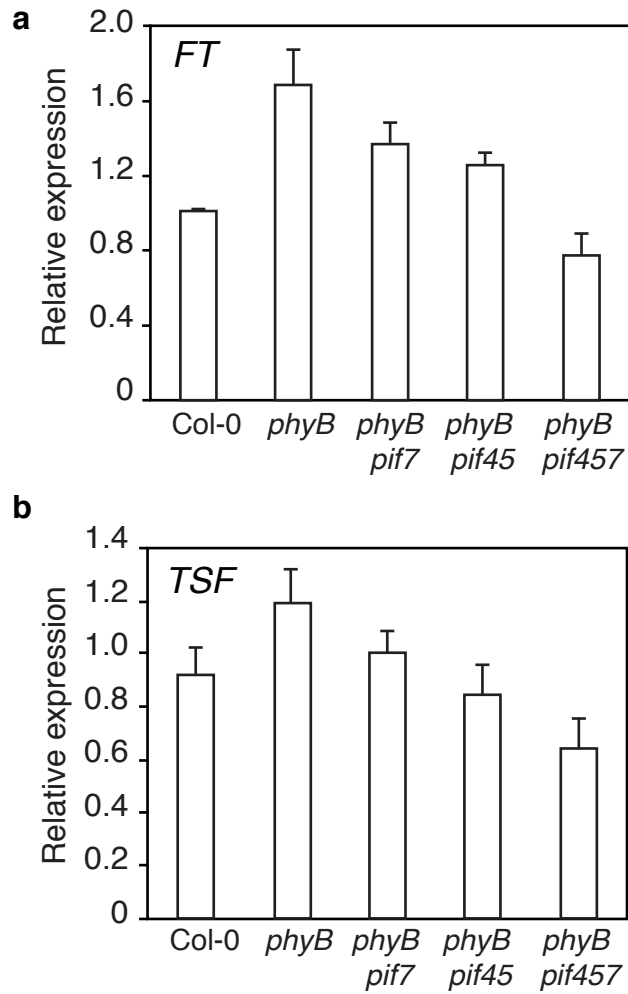

**Supplementary Figure 9**

*FT* **a** and *TSF* **b** mRNA quantification using quantitative real-time PCR (RT-qPCR) of Col-0, *phyB*, *phyB pif7*, *phyB pif4 pif5* and *phyB pif4 pif5 pif7* plants growing under LD at 22°C. Plants were grown high R/FR at 22°C and samples were harvested 10 days after sowing at ZT 15-16. Error bars represent the standard deviation of three biological and three technical replicates.

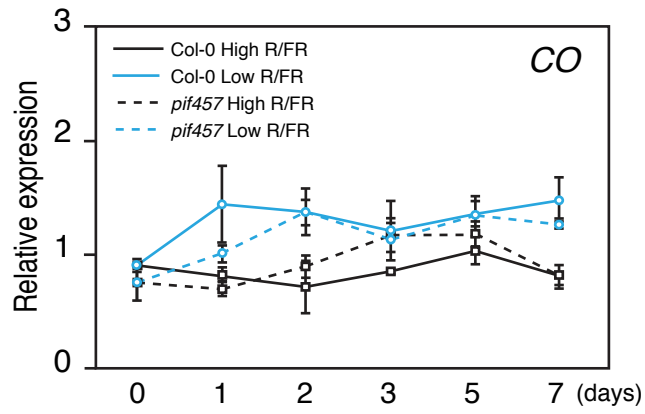

**Supplementary Figure 10**

*CO* mRNA level using quantitative real-time PCR (RT-qPCR) after shift from high to low R/FR in Col-0 and *pif4 pif5 pif7*. Plants were grown on soil for 5 days under LD at 22°C in high R/FR and samples were harvested at ZT 15-16 before (0) and 1, 2, 3, 5, and 7 days after shift to low R/FR. Error bars represent 2x SEM.

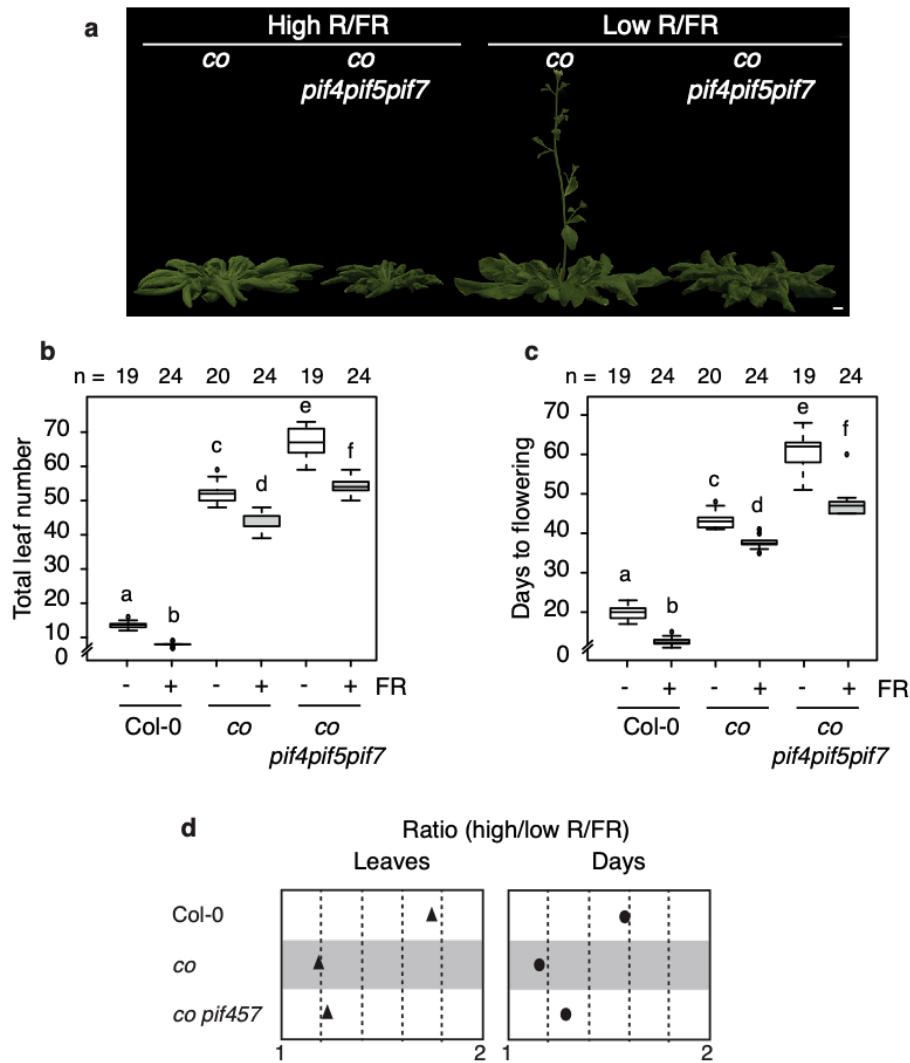

### Supplementary Figure 11

**a** Representative plants of *co* single and *co pif4 pif5 pif7* quadruple mutant were grown under LD at 22°C in high R/FR and low R/FR. Plants were grown under LD at 22°C in high R/FR for 5 days and either kept in the same condition or shifted to low R/FR on day 6 until the onset of flowering. Flowering time phenotype was represented as total leaf number **b** and days to flowering after bolting **c**. **d** Ratio of total leaf number and days to flowering of plants growing under high vs low R/FR represented in **b** and **c**. FR, supplemental far-red light. Letters represent the significance groups at p-value < 0.01 using ANOVA followed by Tukey honestly significant difference (HSD) test. n represent the number of plants phenotyped. Boxplots were created using the online BoxPlotR<sup>1</sup>; center line, median; box limits, upper and lower quartiles; whiskers, 1.5x interquartile range (IQR); dots, outliers. Scale bar correspond to 1 cm.

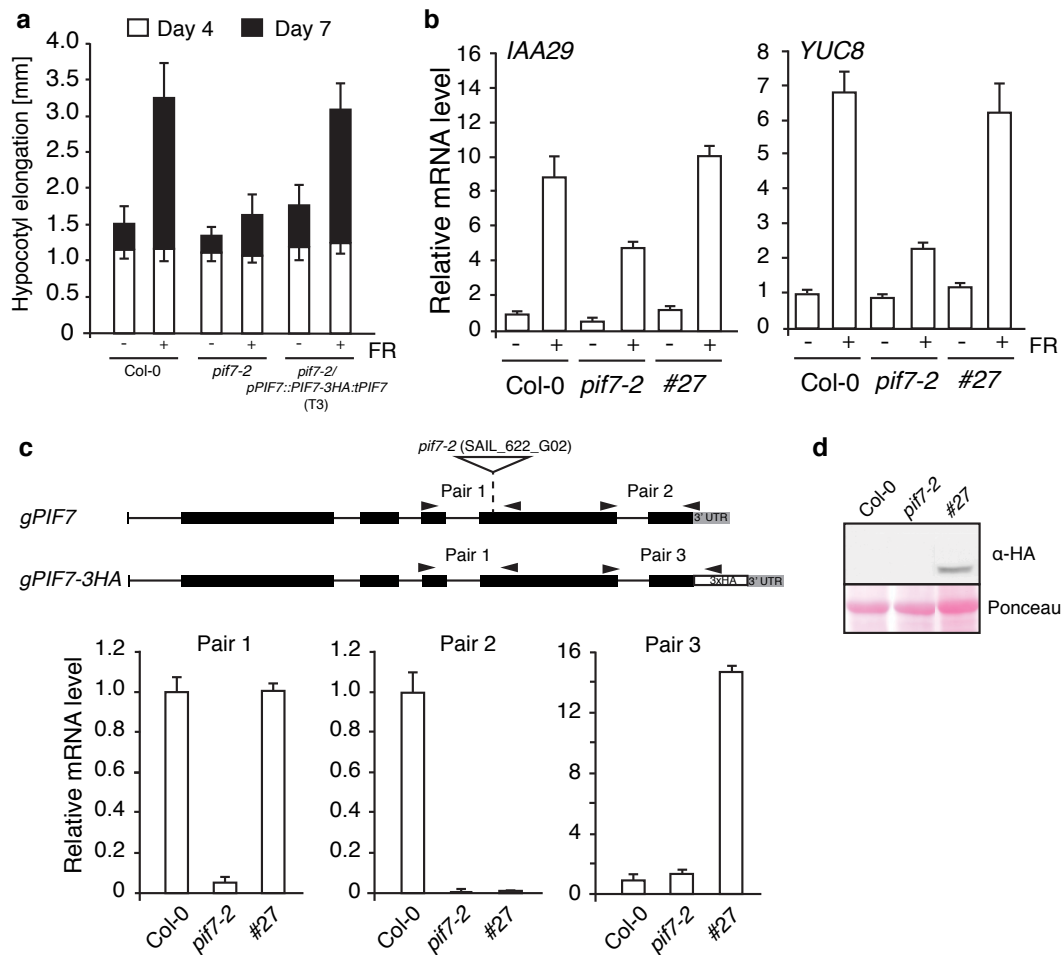

### Supplementary Figure 12

*pPIF7::PIF7-3HA-tPIF7* (*gPIF7*, labelled #27 on the figure) rescues the *pif7-2* short hypocotyl phenotype **a** and the expression of marker genes *IAA29* and *YUC8* **b** in low R/FR. Transgene *gPIF7* expression was confirmed both using quantitative real time PCR (RT-qPCR) with both gene- and transgene-specific oligonucleotides **c** and western blot probed against  $\alpha$ -HA **d**. Error bars represent standard deviation of three biological replicates. FR, supplemental far-red light.

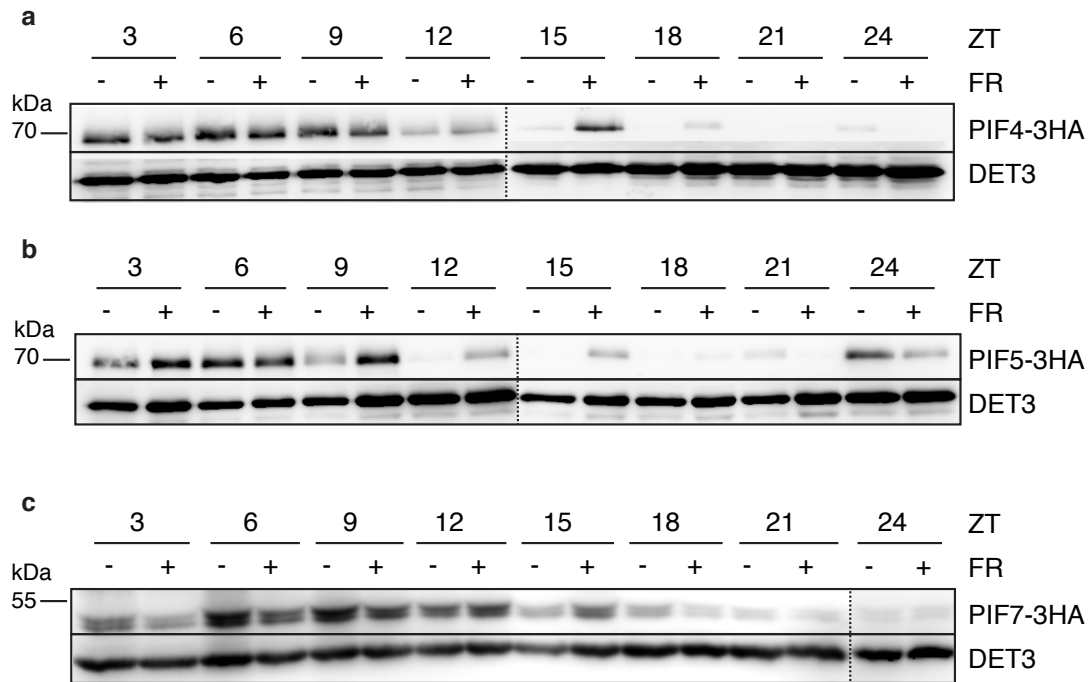

### Supplementary Figure 13

PIF4, PIF5 and PIF7 protein accumulation in high and low R/FR. Western-blot of *pif4-101/pPIF4::PIF4-3HA* **a**, *pif5-3/pPIF5::PIF5-3HA* **b** and *pif7-2/pPIF7::PIF7-3HA* **c**. Plants were grown on soil for 5 days in high R/FR and either kept in control high R/FR or shifted to low R/FR in day 6. Samples were harvested every 3 hours in high and low R/FR of 10-day-old plants for 24 hours. Western-blot were performed using anti-DET3 and anti-HA antibodies.

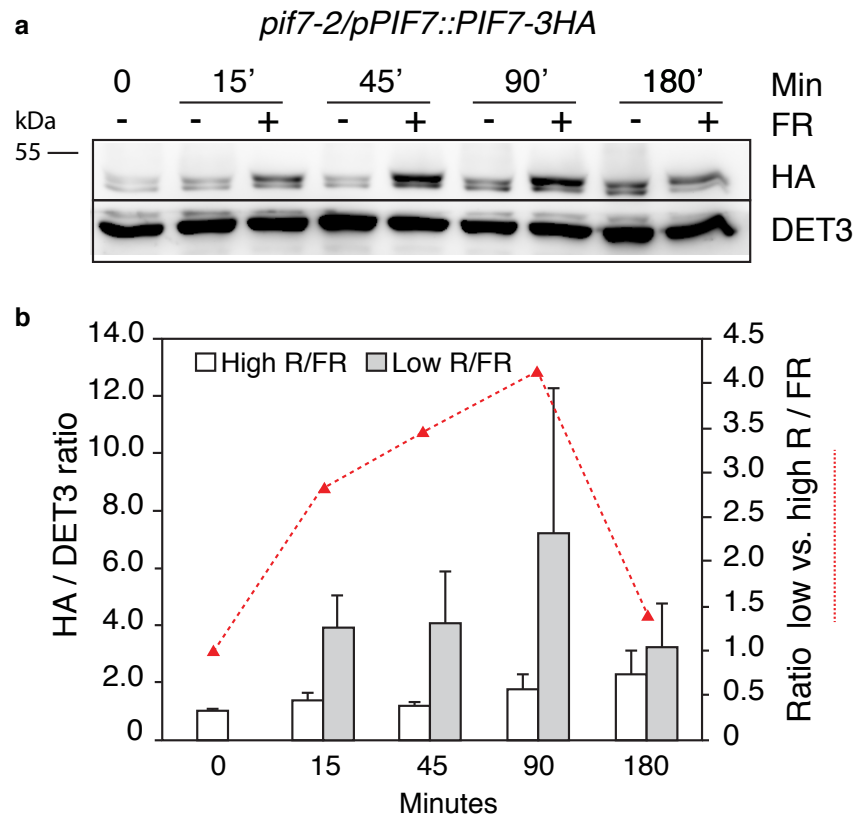

#### Supplementary Figure 14

Short-term PIF7-HA protein accumulation by western-blot in 6-day-old *pif7-2/pPIF7::PIF7-3HA* plants in high and low R/FR **a**, and quantitative analysis over DET3 protein levels **b**. Plants were grown for 5 days in high R/FR and in day 6 either kept in control high R/FR or shifted to low R/FR at ZT2. Samples were harvested before (0) and 15, 45, 90 and 180 minutes after shift to low R/FR. White (high R/FR) and grey (low R/FR) bars correspond to the average protein levels of 3 biological replicates and at least 3 technical replicates relative to DET3. Red dashed line represent the PIF protein level ratio of low/high R/FR. Error bars represent standard deviation. FR, supplemental far-red light. Note that we observe 2 isoforms for PIF7 with more of the slower migrating one present after transfer to low R/FR.

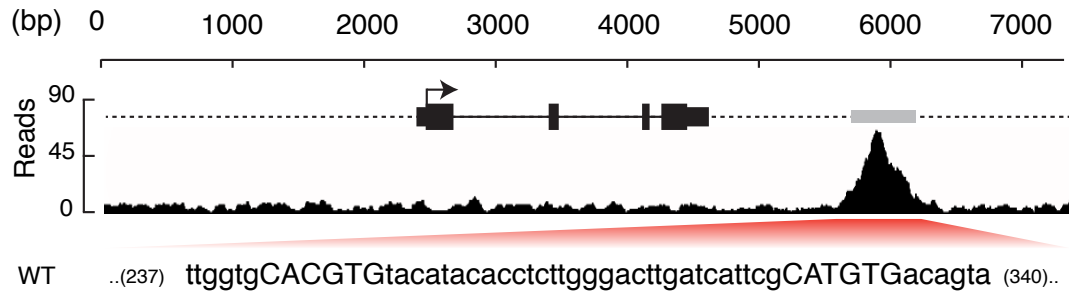

### Supplementary Figure 15

Representation of PIF4 ChIP-seq reads mapped to the *FT* locus (*At1g65480*)<sup>3</sup>. Grey box represents high confidence PIF4 binding peak at the *FT* terminator and nucleotide sequence represent the WT DNA sequence. G-box (CACGTG) and PBE-box (CATGTG) are represented in uppercase.

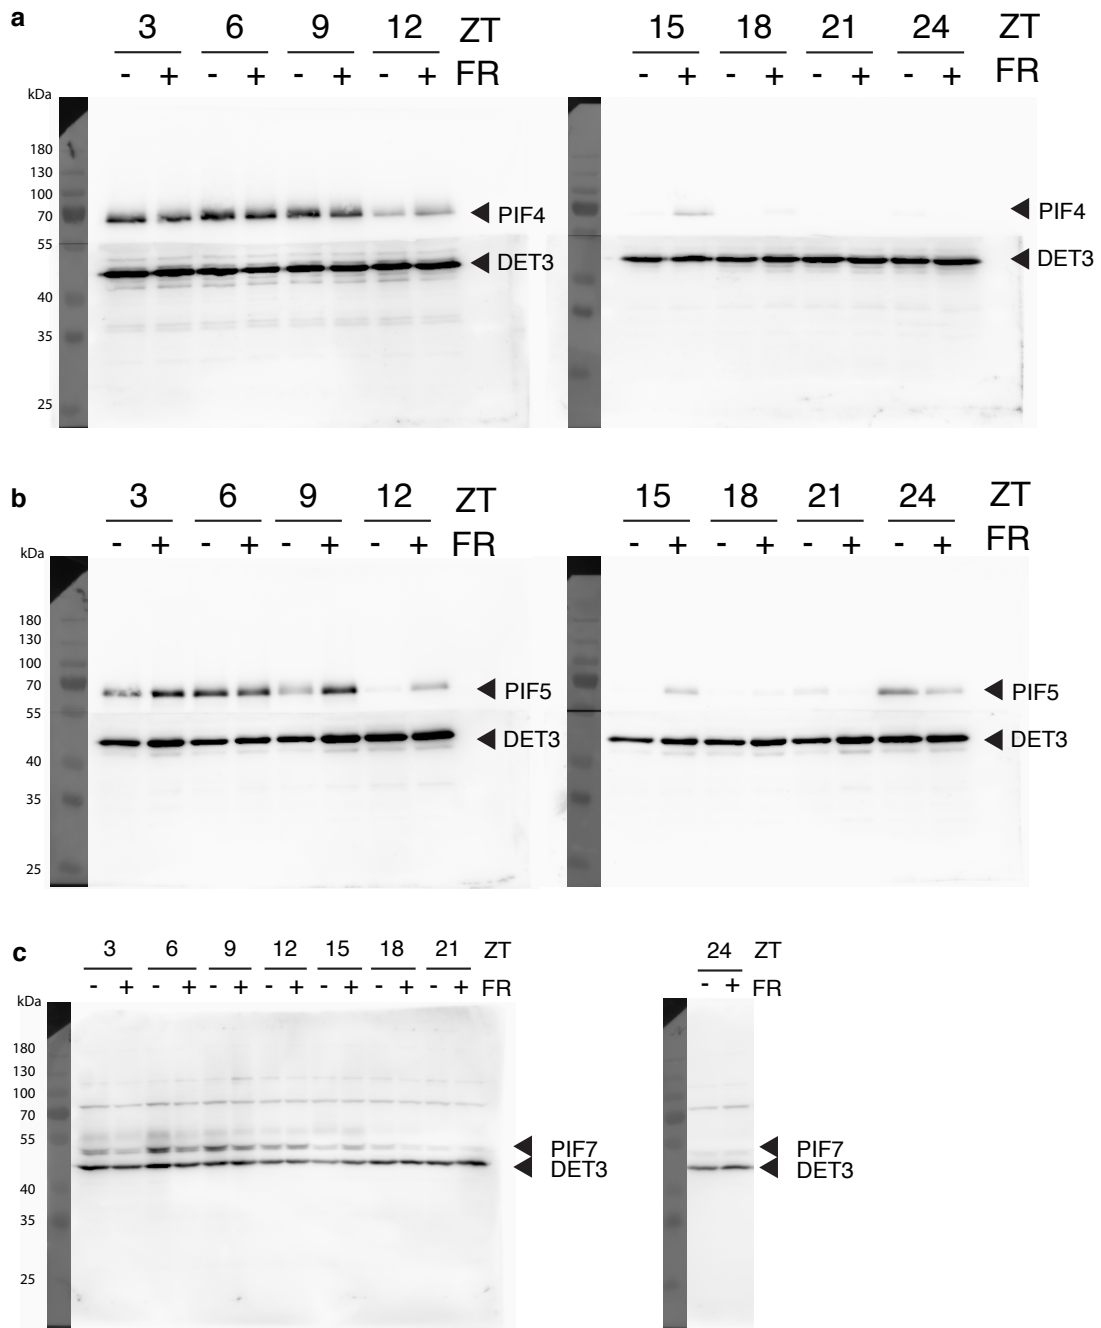

### Supplementary Figure 16

Full western-blots shown in supplementary Figure 13a-c. **a.** PIF4-HA and DET3 loading control. **b.** PIF5-HA and DET3 loading control. **c.** PIF7-HA and DET3 loading control.



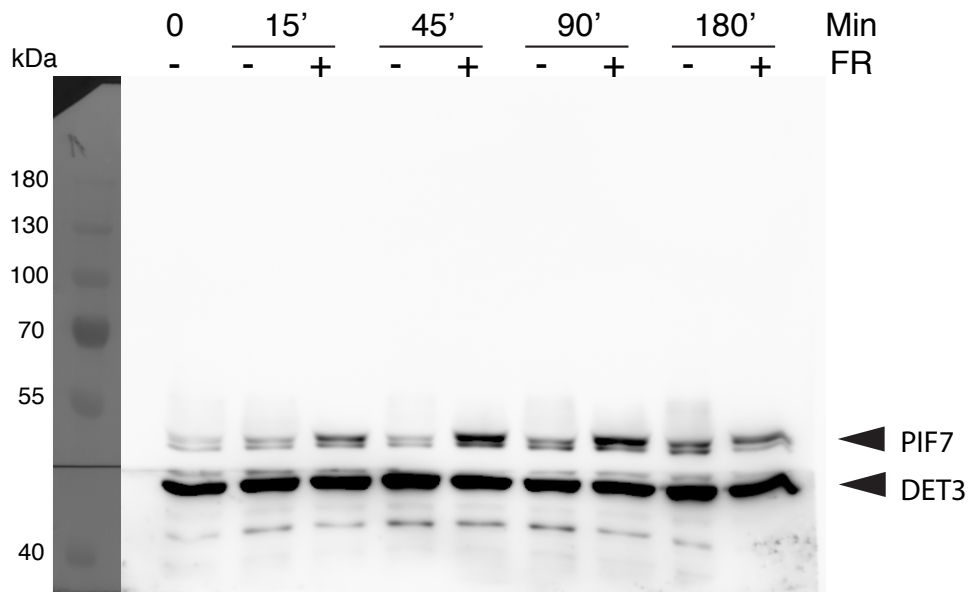

Min - Minutes after shift  
FR - Supplemental far-red light

**Supplementary Figure 17**

Full western-blot shown in supplementary Figure 14a.

**Supplementary Table 1 – List of oligonucleotides used in this study.**

| <b>Oligos used for cloning</b> |                                       |                        |                                                                                                  |
|--------------------------------|---------------------------------------|------------------------|--------------------------------------------------------------------------------------------------|
| <b>Construct</b>               | <b>Backbone/Description</b>           | <b>Oligonucleotide</b> | <b>Sequence (5'&gt;3')</b>                                                                       |
| pASF-02                        | <i>pBGW/pPIF7::PIF7-3HA:tPIF7</i>     | oASF-25                | AGCATGCGACGTCGGGCCCTAATCAAAATTACTT<br>ATATCAATGAAACTATATTTG                                      |
|                                |                                       | oVCG-165               | CTGGAACGTCGTATGGGTAGTCATCTCTTTTCTC<br>ATGATTCTGAAG                                               |
|                                |                                       | oVCG-166               | CTTCGAATCATGAGAAAAGAGATGACTACCCAT<br>ACGACGTTCCAG                                                |
|                                |                                       | oVCG-167               | CAATAATACTAGGTCGCTAGACTATCCTGCATAG<br>TCCGGGAC                                                   |
|                                |                                       | oVCG-168               | GTCCCGGACTATGCAGGATAGtctagcgacctagtattattg<br>CGAGGGTACCCGGGGATCCTGTGCATATGATCT<br>ATTAACATTGAAG |
|                                |                                       | oASF-26                | CGAGGGTACCCGGGGATCCTGTGCATATGATCT<br>ATTAACATTGAAG                                               |
|                                |                                       | pVG-24                 | <i>pMAL-c2 TEV/MBP-PIF7_bHLH</i>                                                                 |
| oVCG-192 (XbaI)                | CCTCTAGACTTCATTGTTGGTGTGGATGCTG       |                        |                                                                                                  |
| pVG-55                         | <i>pGREENII-0800/pTSF::fLUC</i>       | oVCG-440 (XhoI)        | CCCCCTCGAGGTCGACGGGTTTTTTTCTCGGTC<br>ATAAACG                                                     |
|                                |                                       | oVCG-441 (NotI)        | GGTGGCGCCGCTCTAATTTATCTTGGATCTCAA<br>GTATCTC                                                     |
| pVG-84                         | <i>pGREENII-0800/pTSF 1xmut::fLUC</i> | ..                     | ..                                                                                               |
| pVG-87                         | <i>pGREENII-0800/pTSF 3xmut::fLUC</i> | oVCG-374               | CAATGCCCGGATTTATCTCTCTGT                                                                         |
|                                |                                       | oVCG-559               | GACCAGTTTCATTTGCTGACCAC                                                                          |
|                                |                                       | oVCG-378               | GTGGTCAGCAAATGAAACTG                                                                             |
|                                |                                       | oASF-73                | TTCTTATCCAAAACCCACCAG                                                                            |
|                                |                                       | oVCG-560               | CTGGTGGGTTTTTGAATAAG                                                                             |
|                                |                                       | oVCG-381               | ATTTATCTTGGATCTCAAGTATCTC                                                                        |
|                                |                                       | oVCG-440 (XhoI)        | CCCCCTCGAGGTCGACGGGTTTTTTTCTCGGTC<br>ATAAACG                                                     |
|                                |                                       | oVCG-441 (NotI)        | GGTGGCGCCGCTCTAATTTATCTTGGATCTCAA<br>GTATCTC                                                     |
| pAM-01                         | <i>pCB308/pPIF4::GUS</i>              | SL-128 (BamHI)         | ATCGGATCCGCCCAATCTGCCGACAAG                                                                      |
|                                |                                       | SL-129 (BamHI)         | ATCGGATCCGCTAGCGTCAGATCTCTGGAGACAT                                                               |
| pAM-03                         | <i>pCB308/pPIF5::GUS</i>              | SL-132 (BamHI)         | ATCGGATCCAAATACAACGACATCATTG<br>ATCGGATCCGCTAGCGTCAGATCTGTAAAGACA<br>CT                          |
|                                |                                       | SL-133 (BamHI)         | ATCGGATCCGCTAGCGTCAGATCTGTAAAGACA<br>CT                                                          |
| pMK-09                         | <i>pCB308/pPIF7::GUS</i>              | MK-207 (XbaI)          | CCGTCTAGAAAAGAGTCGAACAGGGAAAGTTC                                                                 |
|                                |                                       | MK-208 (BamHI)         | CCGGGATCCGTGTTACTTAGGCCGCACG                                                                     |

| <b>Oligos used for genotyping</b> |                   |                        |                                    |
|-----------------------------------|-------------------|------------------------|------------------------------------|
| <b>Allele</b>                     | <b>Collection</b> | <b>Oligonucleotide</b> | <b>Sequence</b>                    |
| <i>phyB-9</i>                     | Point mutation    | PB9                    | GTGTCTGCGTTCTCAAAAACG              |
|                                   |                   | B9dCAPS                | GTGGAAGAAGCTCGACCAGGCTTTG          |
| <i>ft-10</i>                      | GK-290E08         | oVCG-53                | CCCATTGGACGTGAATGTAGACAC           |
|                                   |                   | oVCG-417               | CGAGCAACATGTTTGTAGCTAT             |
| <i>co-101</i>                     | SAIL_24_H04       | oVCG-61                | TAGCATCTGAATTTTATAACCAATCTCGATACAC |
|                                   |                   | oVCG-143               | AGTCCCACACCATCAAACCTACTACATC       |
| <i>tsf-1</i>                      | SALK_087522       | oVCG-55                | ACGTGGACTCTCGTAGCACAC              |
|                                   |                   | oVCG-56                | ATTTTGCCGATTTTCGGAAC               |
| <i>pif3-1</i>                     | SALK_030753       | CF-230                 | AGGCATTCCCATACCCATTG               |
|                                   |                   | oVCG-56                | ATTTTGCCGATTTTCGGAAC               |
| <i>pif4-101</i>                   | SAIL_114_G06      | SL-43                  | CAGACGGTTGATCATCTG                 |
|                                   |                   | oVCG-61                | TAGCATCTGAATTTTATAACCAATCTCGATACAC |
| <i>pif5-3 (pil6-1)</i>            | SALK_087012       | SL-46                  | TCGCTCACTCGCTTACTTAC               |
|                                   |                   | oVCG-56                | ATTTTGCCGATTTTCGGAAC               |

|               |              |         |                                     |
|---------------|--------------|---------|-------------------------------------|
| <i>pif7-1</i> | CS68809      | SL-195  | GTGGCAAGTTGGCTCTTAGG                |
|               |              | SL-169  | TGATAGTGACCTTAGGCGACTTTTGAACGC      |
| <i>pif7-2</i> | SAIL_622_G02 | oASF-27 | GGAGAGCCATAGAGTTGG                  |
|               |              | oVCG-61 | TAGCATCTGAATTTTCATAACCAATCTCGATACAC |

| Oligos used for RT-qPCR |                   |                 |                              |
|-------------------------|-------------------|-----------------|------------------------------|
| Target                  | Primer Efficiency | Oligonucleotide | Sequence                     |
| <i>FT</i>               | 2.00              | oVCG-27         | CCCTGCTACAACCTGGAACAAC       |
|                         |                   | oVCG-28         | CACCCTGGTGCATACACTG          |
| <i>TSF</i>              | 2.00              | MT-608          | TGGAGATGTTCTTGATCCTTTC       |
|                         |                   | MT-609          | TAGATCCAAGCCATTAGTAACC       |
| <i>CO</i>               | 2.05              | MT-596          | AACGCCTGCACCGTGTATTG         |
|                         |                   | MT-597          | ACGCGATTGGCAGAGTGAAC         |
| <i>PIF4</i>             | 2.02              | oVCG-246        | TACCTCGATTTCCGGTTATGGATC     |
|                         |                   | oVCG-247        | GTTGTTGACTTTGCTGTCCCGC       |
| <i>PIF5</i>             | 2.01              | oVCG-588        | GAGCAGCTCGCTAGGTACATG        |
|                         |                   | oVCG-589        | GTTGTTGTTGCACGGTCTG          |
| <i>PIF7</i>             | 1.99              | SL-194          | AAAGGAGACGGCGTGATAGG         |
|                         |                   | SL-195          | GTGGCAAGTTGGCTCTTAGG         |
| <i>PIL1</i>             | 1.92              | MT-125          | TCAGACTCAGGCTACTTCTTTTACTCA  |
|                         |                   | MT-126          | TCCTCTATATTGCATTGCATCTTCTAA  |
| <i>IAA29</i>            | 1.94              | MT-157          | CTTCCAAGGGAAAGAGGGTGA        |
|                         |                   | MT-158          | TTCCGCAAAGATCTTCCATGTAAC     |
| <i>YUC8</i>             | 2.00              | MT-271          | GGCGGCTTGTCTCCATGAAC         |
|                         |                   | MT-171          | ACTGTTGACCTCGACGTTGTTG       |
| UBC                     | 1.94              | UBC-F           | CAGTCTGTGTGTAGAGCTATCATAGCAT |
|                         |                   | UBC-R           | AGAAGATTCCCTGAGTCGCAGTT      |
| YSL8                    | 2.00              | YSL8-F          | TCATTCGTTTCGGCCATGA          |
|                         |                   | YSL8-R          | CTCAGCAACAGACGCAAGCA         |
| PIF7 - Pair 1           | 1.99              | SL-194          | AAAGGAGACGGCGTGATAGG         |
|                         |                   | SL-195          | GTGGCAAGTTGGCTCTTAGG         |
| PIF7 - Pair 2           | 1.97              | oASF-52         | GAACCACCCAAAGAAGCGTA         |
|                         |                   | oASF-53         | CTGATCCATACAGCGCCTTT         |
| PIF7 - Pair 3           | 1.94              | oASF-63         | TAGGTCGCTAGACTAATCTC         |
|                         |                   | oASF-53         | CTGATCCATACAGCGCCTTT         |

Supplementary Table 2 – DNA sequences.

**pTSF\_3xmut synthesis**

tttttggtcagcaaatgaaactggtctgcaatagtttttagaagctttatcggtttatttctcatgGgttttgcagaaattcttagaa  
attttgcttccaaactggggaactaaattgtttggagtgaagaatacacgggtgagcttttaggtaatacactgttttgaaaggt  
ataatgaattttaaaaaatactttatcaacatttaagattggagacaatttgaaatcacggttgaaaacgaattttggccaattgtt  
cactttctgctgttattatacttctgttaccttgtgtctattgttaattactgtttatttgattactcattgtttaaaagtttactggtt  
gtttgttaaattgatattttgatggtattaattaagtttagtactacattaagaaaagaaaaaaagagcttagtactgtacacac  
caaccagatatgtgaacaattatggcgtcaatttatctggagcatatatacttttatatgatggttaggtgaaggagtatttctaaaat  
gcattaacatcataataatcggtgtaatgtagtgccttaactatttaaatgagtacatgGgacgcaaaatgcgtgacgtacgca  
aatatgcagcatatttatgcttgtgacatttttaaatagttcatgaagttacaatgataagtcagaataaattacatactagtggtta  
gcaagaaacaagGggatgatgataattttggaatatgattttctgttttatactgggtgggttttgaataagaataactataaatttag  
aaaaaggaaagaaaaaaaacatg

**PIF7\_bHLH**

```
aatggacgacggggacgagcagcagcgattcacaacgagtccgaaaggagacggcgtgataggataaaccagaggatgag
aacacttcagaagctgcttctactgcaagtaaggcggataaagtctcaatcttgatgatgttatcgaacacttgaaacagctaca
agcacaagtacagttcatgagcctaagagccaacttgccacaacaaatgatgattccgcaactacctccaccacagtcagttctca
gcatccaacaccaaca
```

## References

1. Krzywinski M, Altman N. Visualizing samples with box plots. *Nat. Methods* **11**, 119-120 (2014).
2. Kohnen MV, *et al.* Neighbor detection induces organ-specific transcriptomes, revealing patterns underlying hypocotyl-specific growth. *Plant Cell* **28**, 2889-2904 (2016).
3. Pedmale UV, *et al.* Cryptochromes interact directly with PIFs to control plant growth in limiting blue light. *Cell* **164**, 233-245 (2016).
